# Supplementary material for: Denser brain capillary network with preserved pericytes in Alzheimer's disease
Source: PubMed Central journal article supplement — Brain Pathol. 2020 Sep 29;30(6):1071–86. doi: 10.1111/bpa.12897 (PMC8018033; doi:10.1111/bpa.12897), 2020-09-29
Supplement: BPA-30-1071-s001.pdf [file BPA-30-1071-s001.pdf]

Middle frontal gyrus

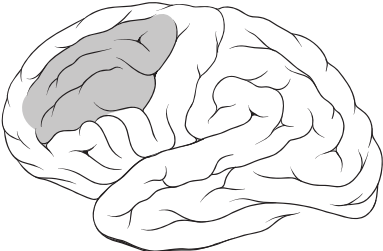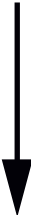

Frozen 60  $\mu\text{m}$  sections  
PDGFR $\beta$  + Laminin staining

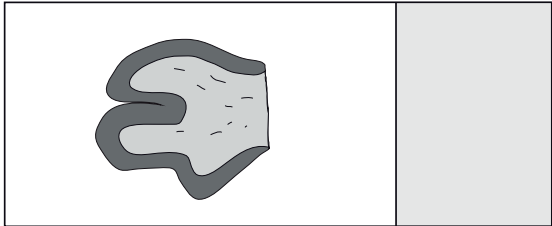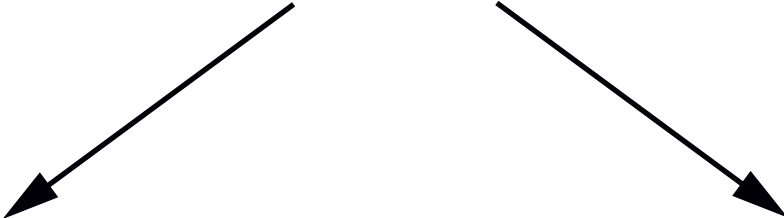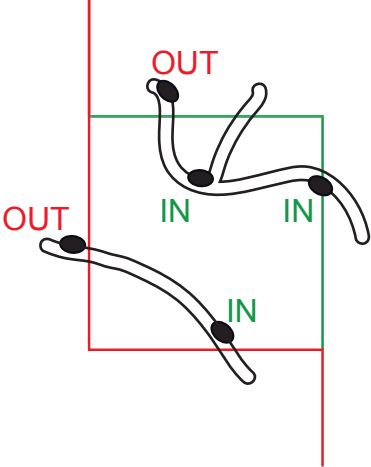

optical fractionator  $\Rightarrow$   
pericyte density (cells/  $\text{mm}^3$ )

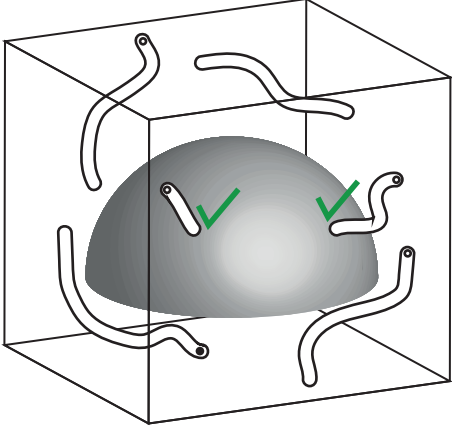

counting balls  $\Rightarrow$   
vascular linear density (mm/ $\text{mm}^3$ )

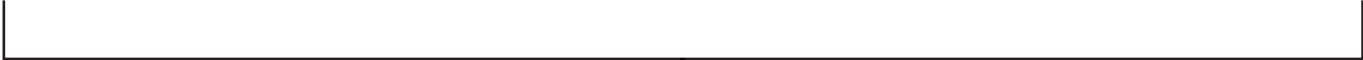

pericyte linear density (cells/mm)
