# Supplementary figures and images for: Denser brain capillary network with preserved pericytes in Alzheimer's disease
Source: PubMed Central journal article supplement — Brain Pathol. 2020 Sep 29;30(6):1071–86. doi: 10.1111/bpa.12897 (PMC8018033; doi:10.1111/bpa.12897), 2020-09-29

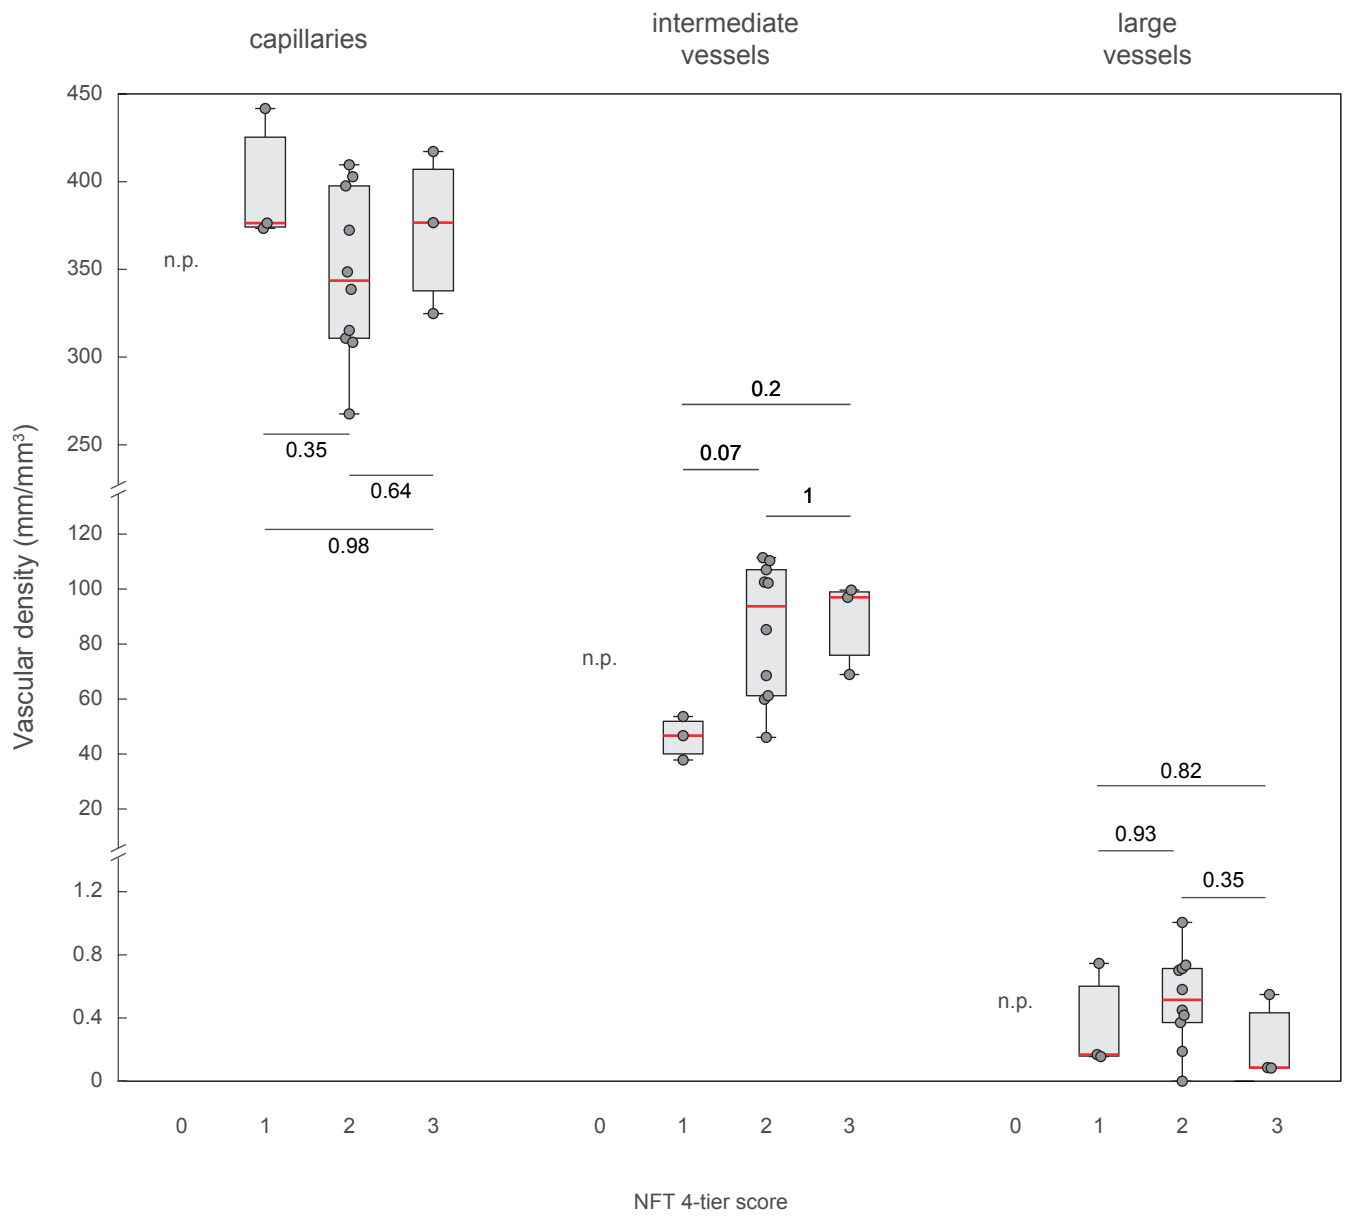

Supplement: BPA-30-1071-s002.pdf [file BPA-30-1071-s002.pdf]

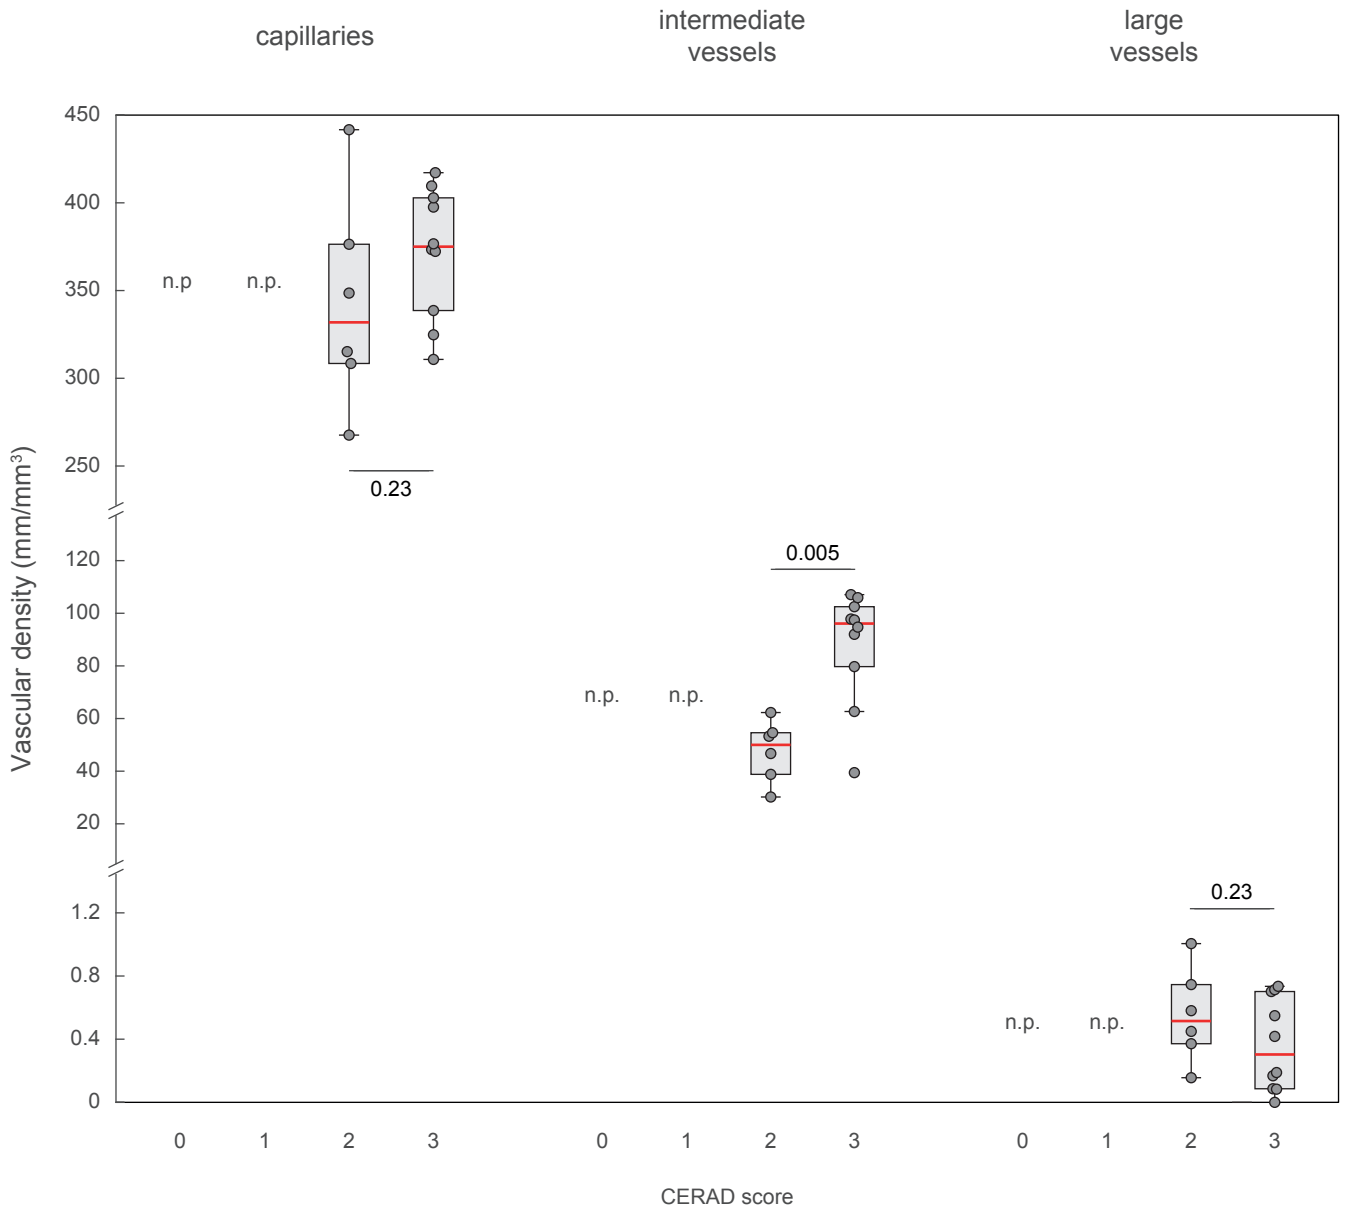

Supplement: BPA-30-1071-s003.pdf [file BPA-30-1071-s003.pdf]

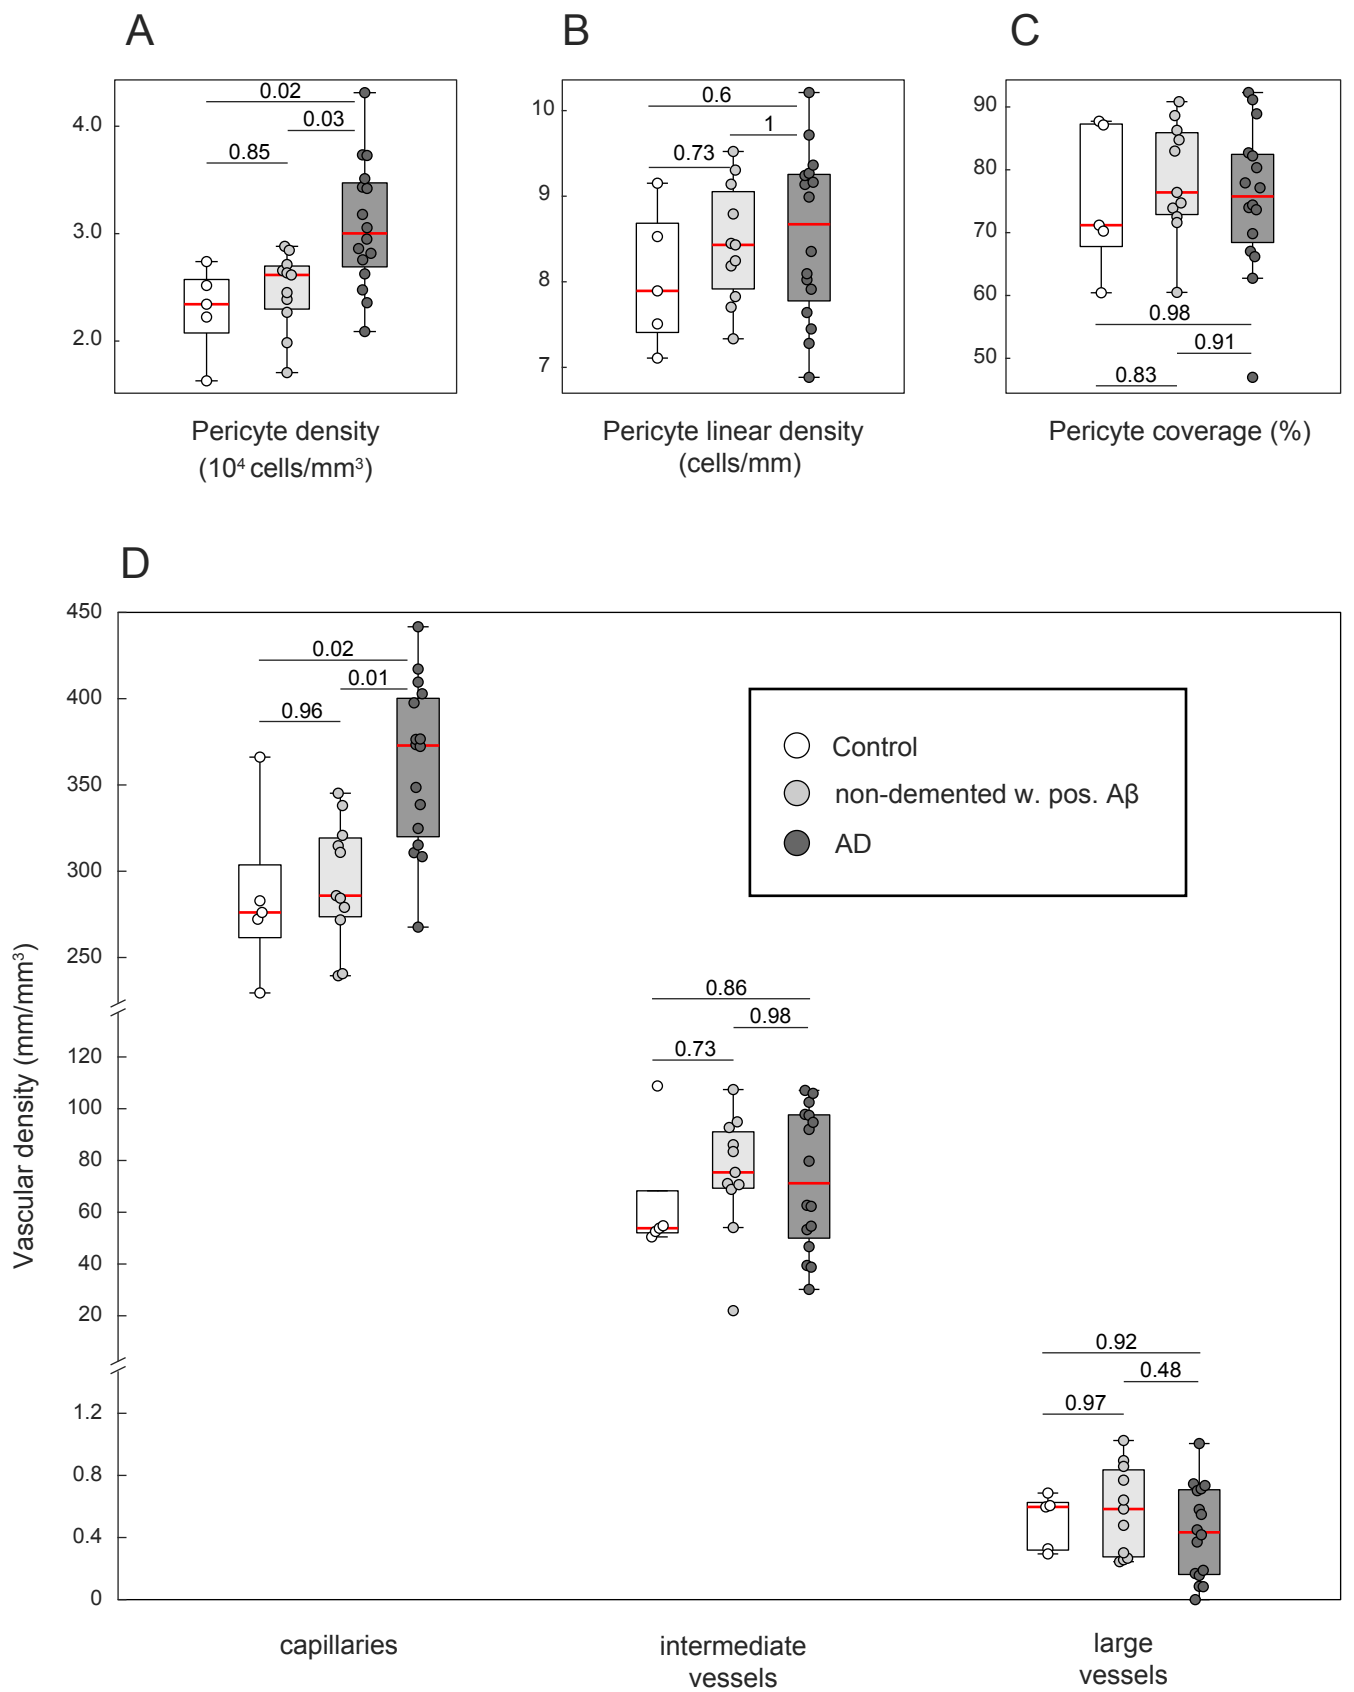

Supplement: BPA-30-1071-s004.pdf [file BPA-30-1071-s004.pdf]

A

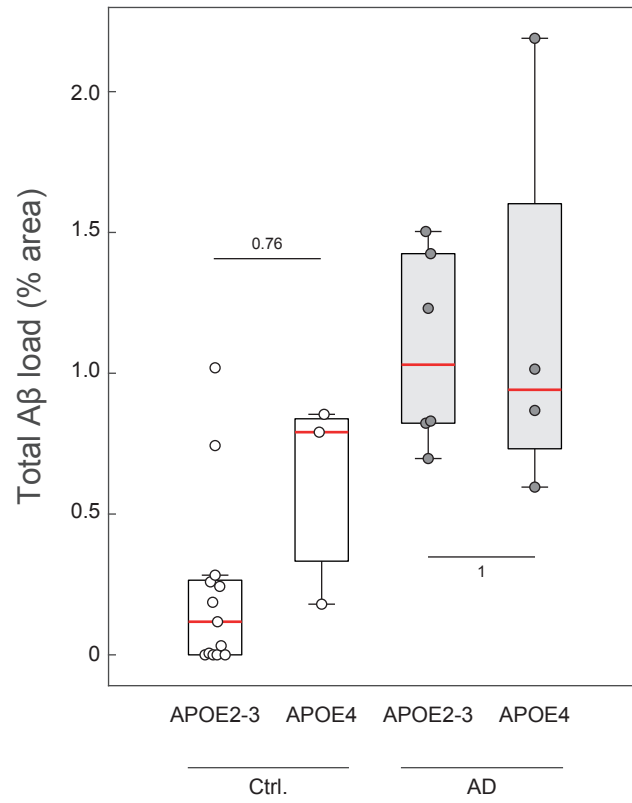

B

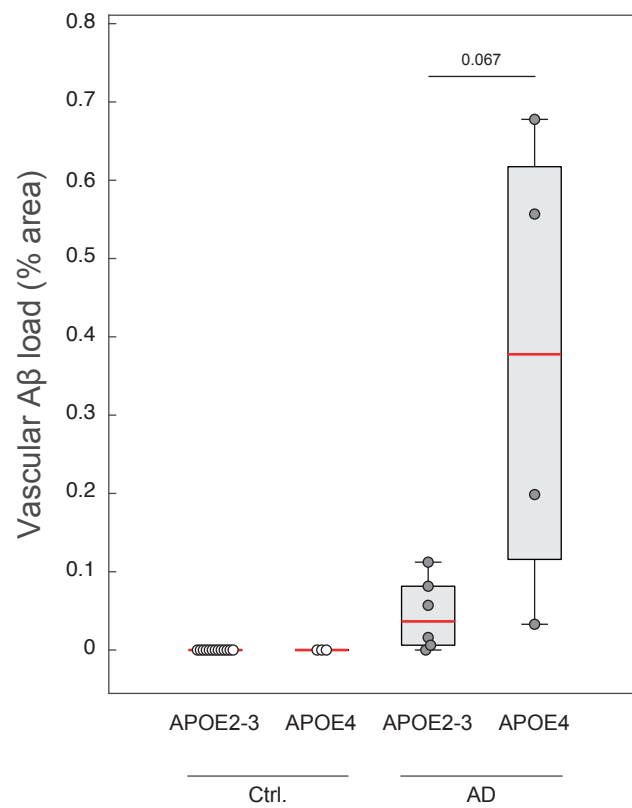

Supplement: BPA-30-1071-s005.pdf [file BPA-30-1071-s005.pdf]

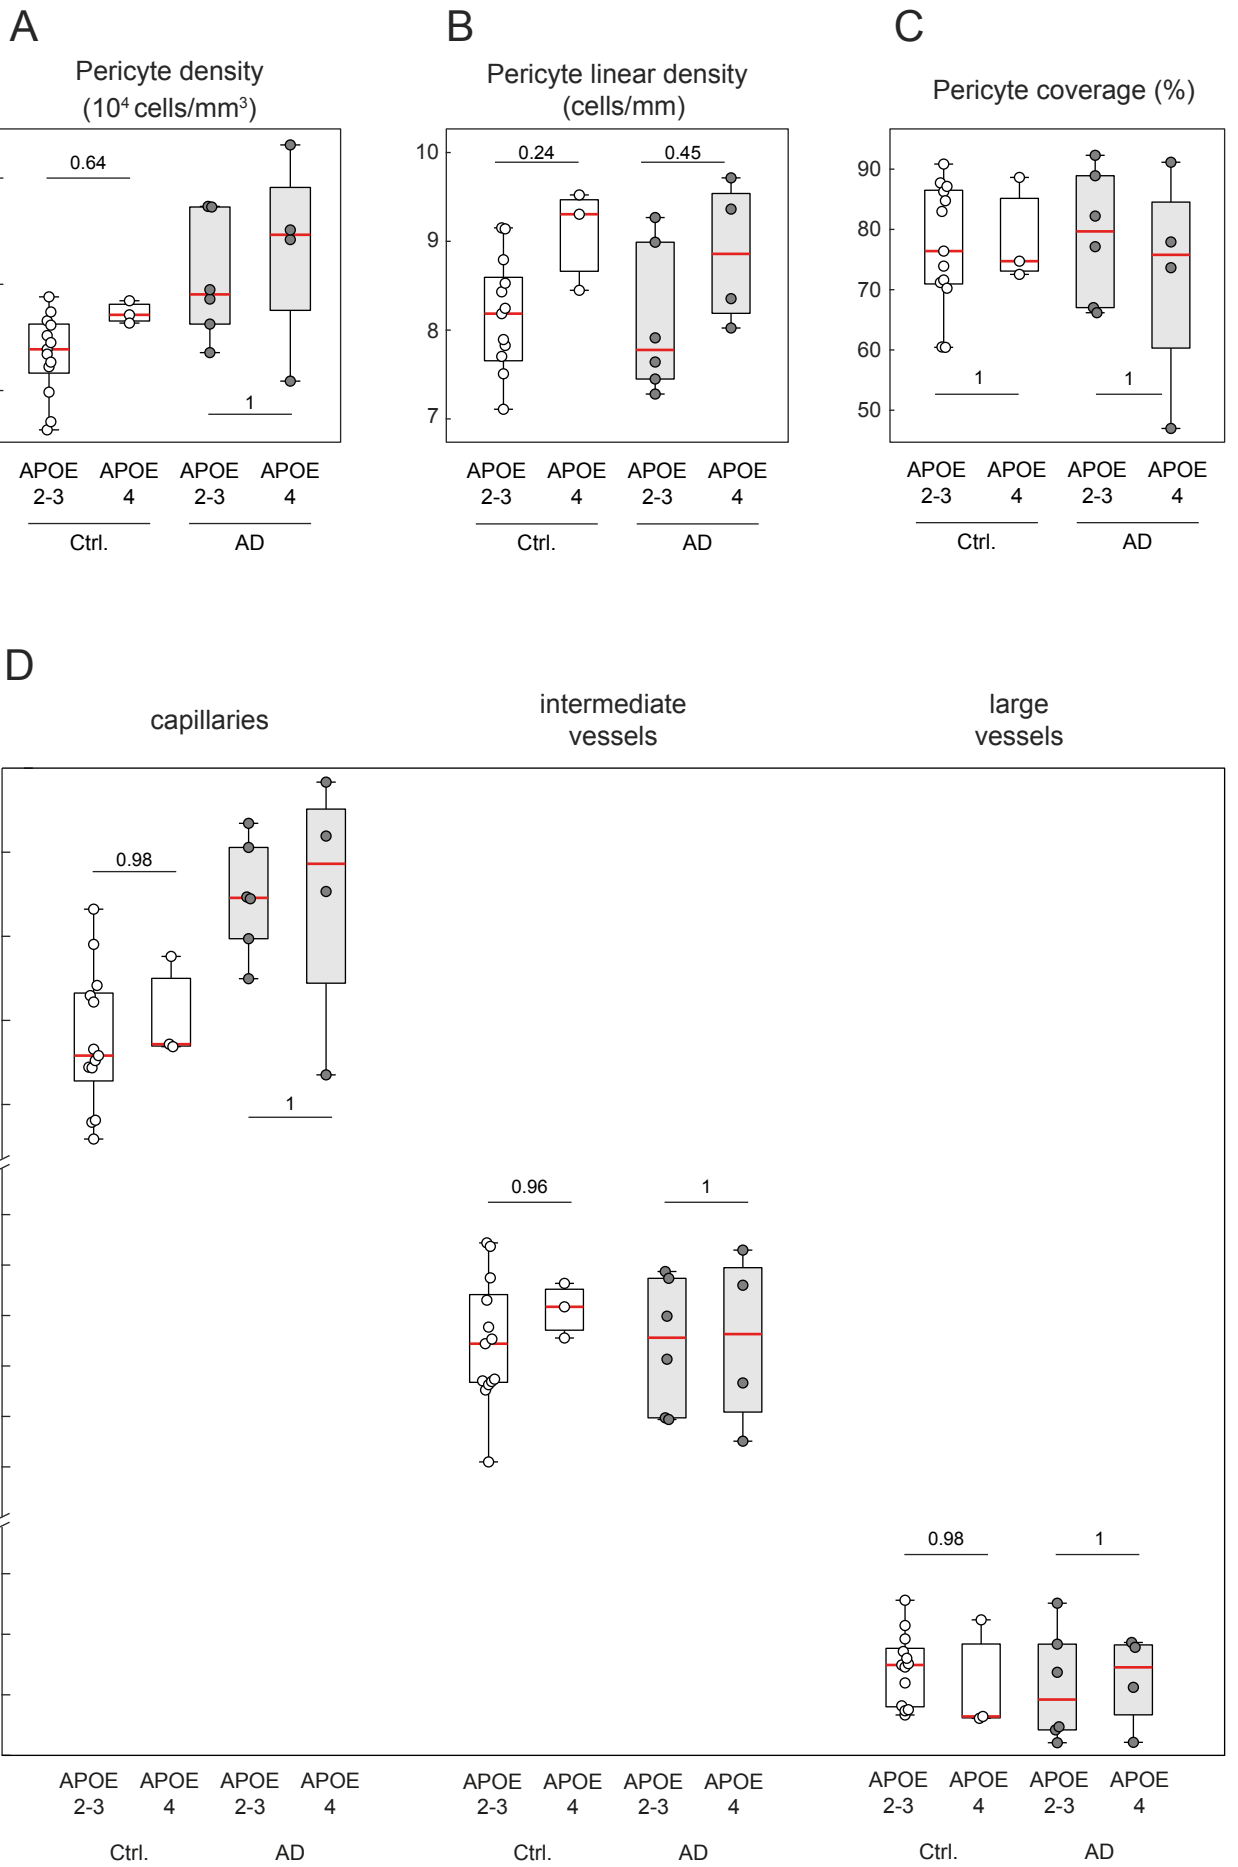

Supplement: BPA-30-1071-s006.pdf [file BPA-30-1071-s006.pdf]

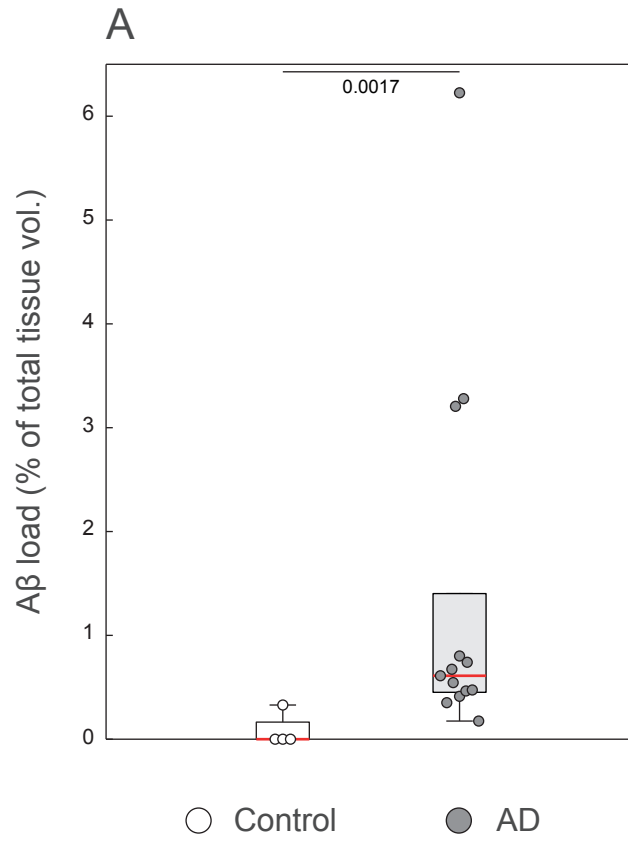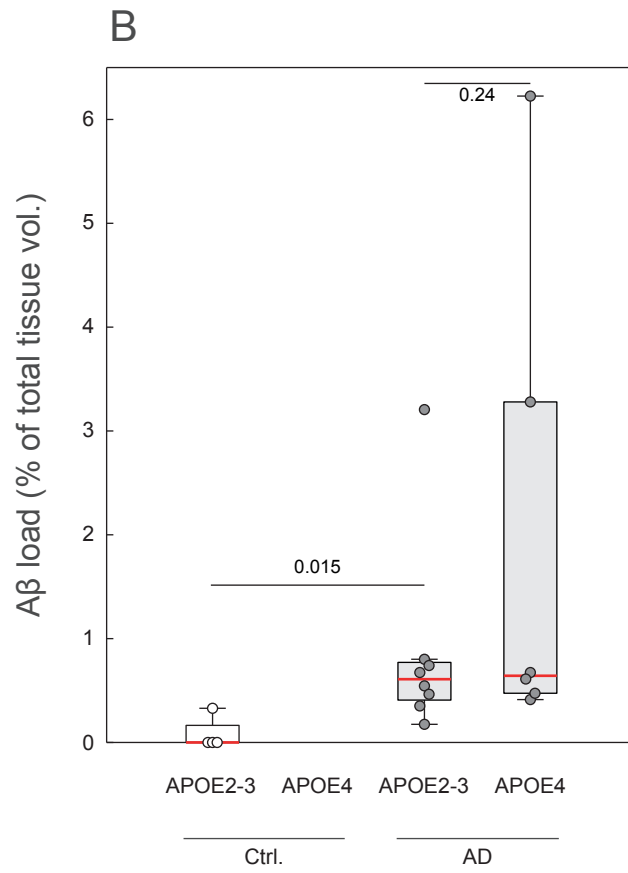

Supplement: BPA-30-1071-s007.pdf [file BPA-30-1071-s007.pdf]

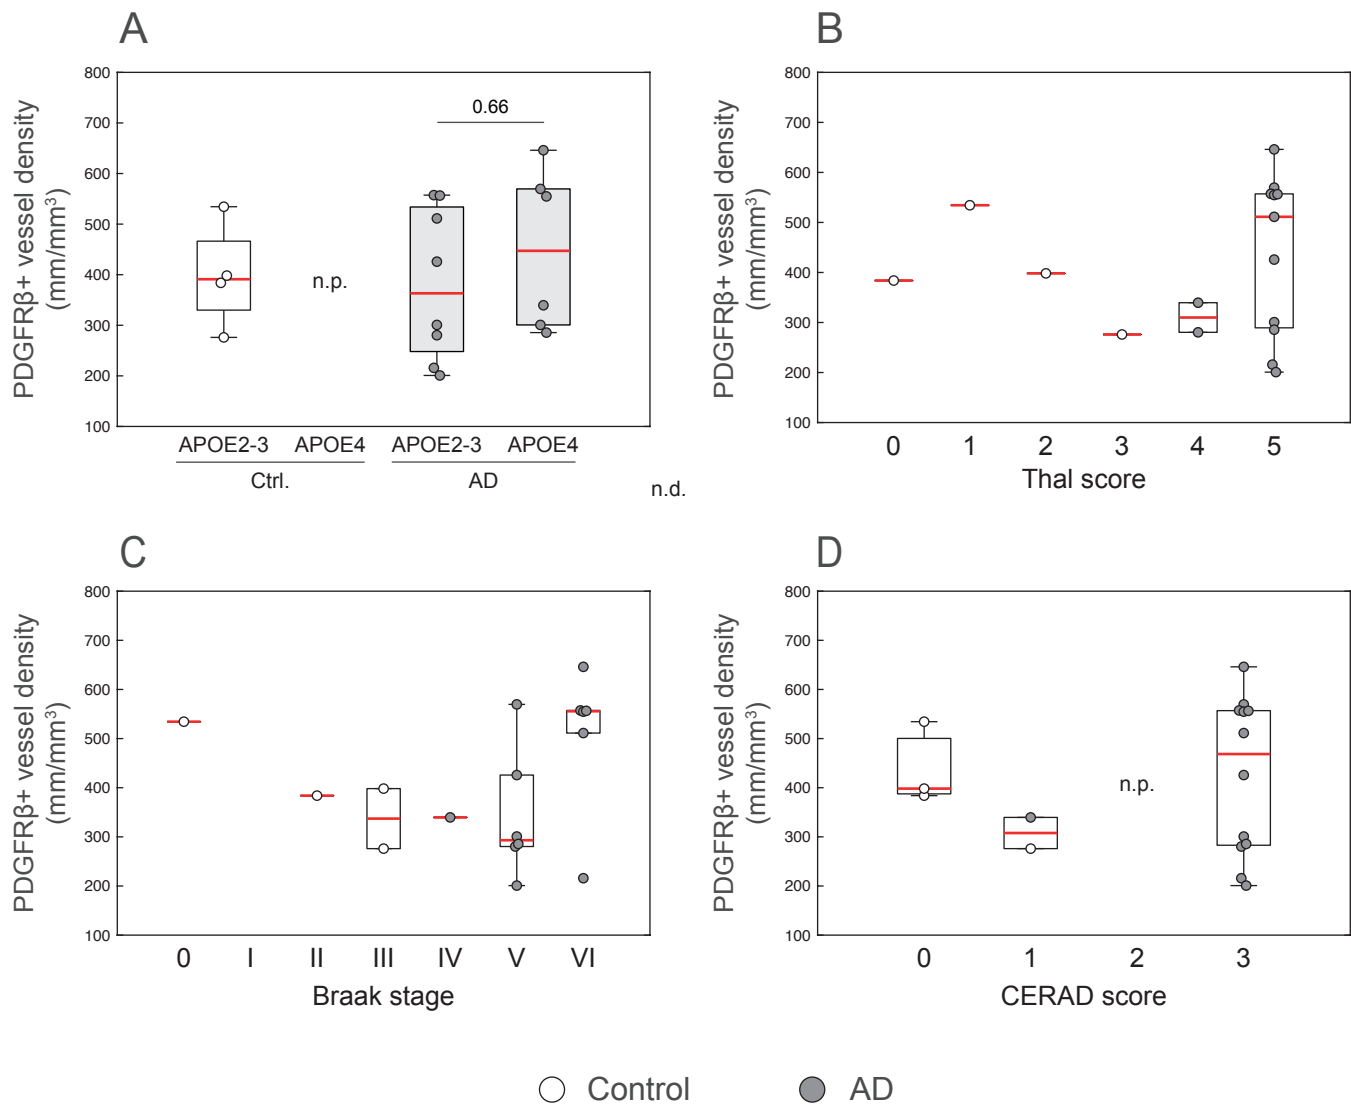

Supplement: BPA-30-1071-s008.pdf [file BPA-30-1071-s008.pdf]

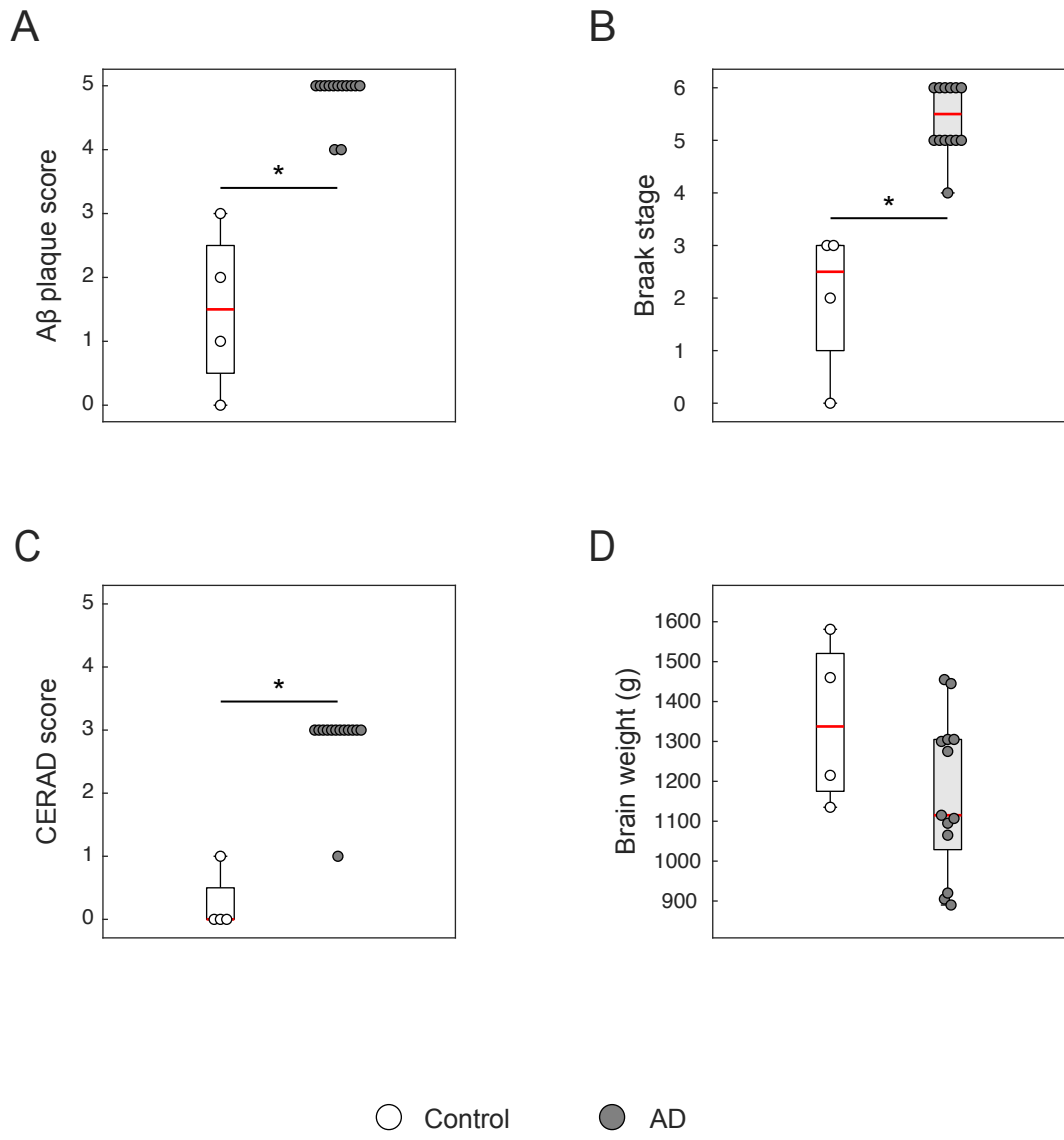

Supplement: BPA-30-1071-s011.pdf [file BPA-30-1071-s011.pdf]

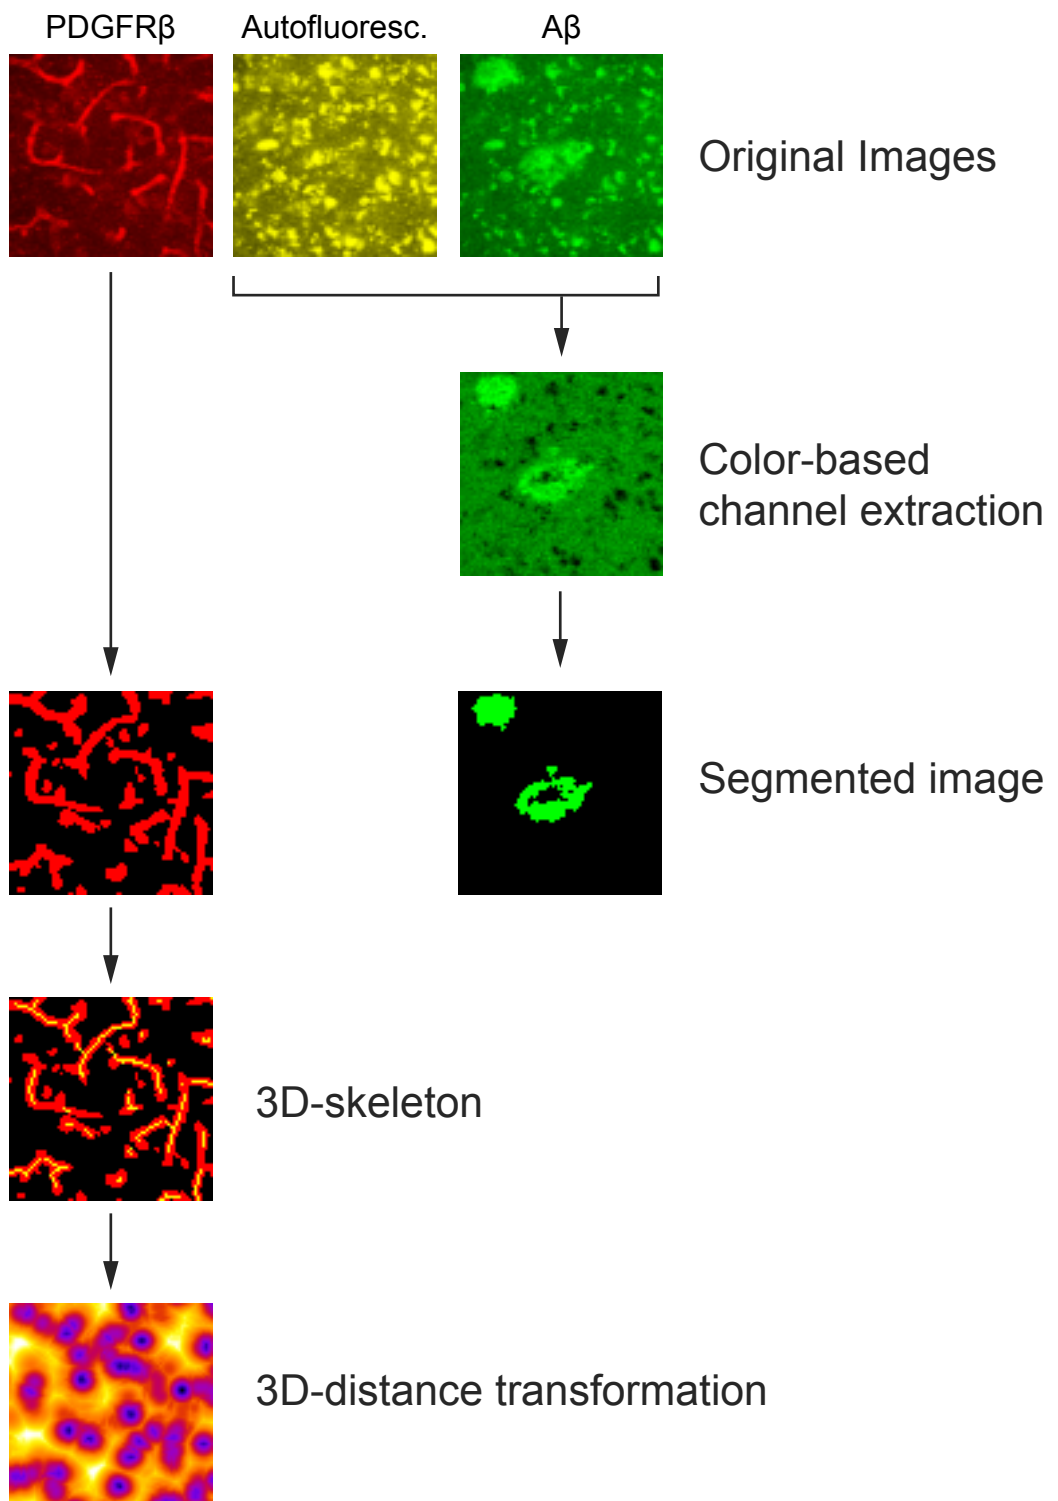

Supplement: BPA-30-1071-s012.pdf [file BPA-30-1071-s012.pdf]

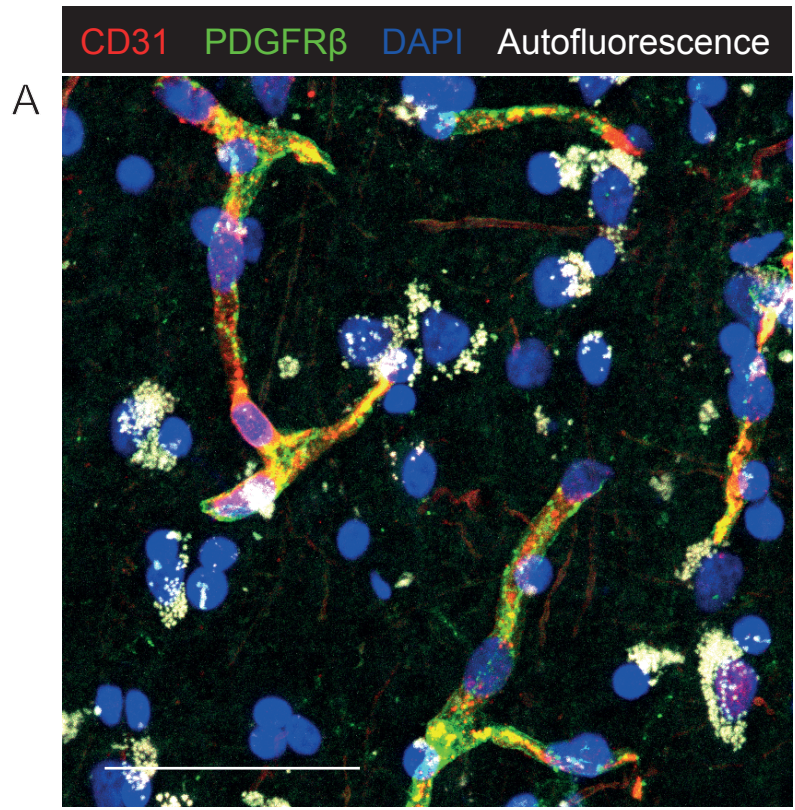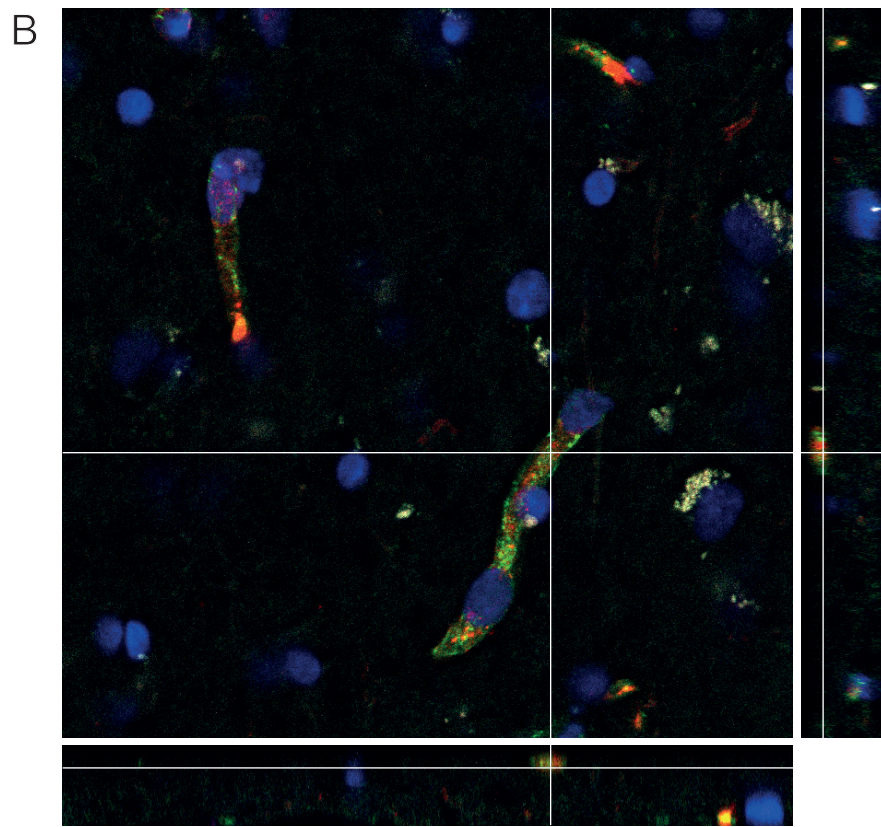

Supplement: BPA-30-1071-s013.pdf [file BPA-30-1071-s013.pdf]

**A**

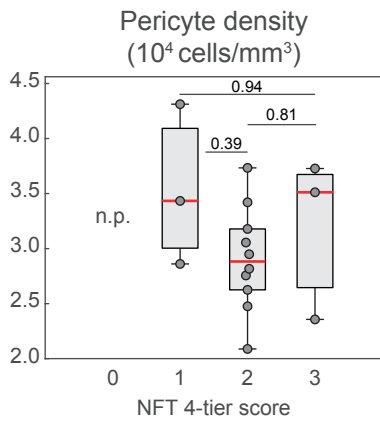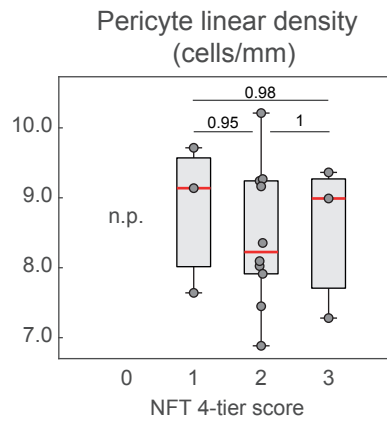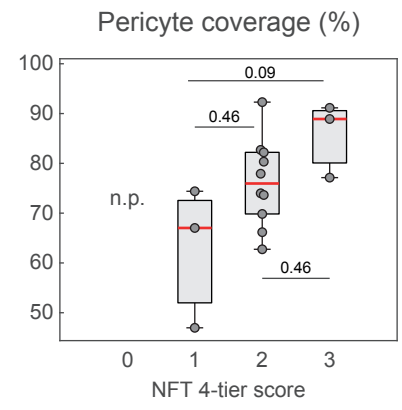

**B**

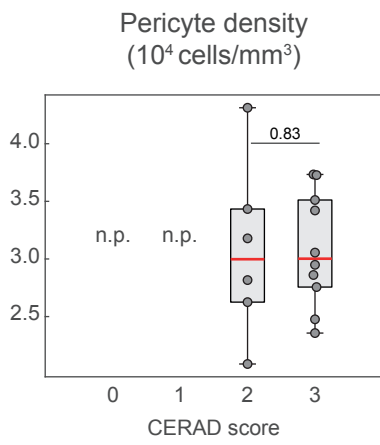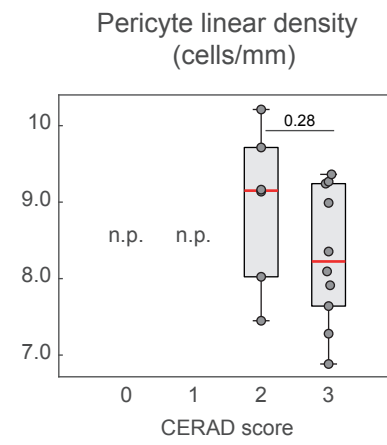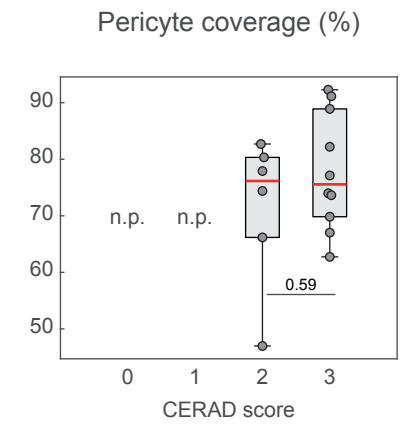

Supplement: BPA-30-1071-s014.pdf [file BPA-30-1071-s014.pdf]
